# Supplementary material for: Ptch2 loss drives myeloproliferation and myeloproliferative neoplasm progression
Source: PubMed Central journal article supplement — J Exp Med. 2016 Feb 8;213(2):273–90. doi: 10.1084/jem.20150556 (PMC4749921; doi:10.1084/jem.20150556), 2016-02-08
Supplement: supp_jem.20150556_JEM_20150556_sm.pdf [file supp_jem.20150556_JEM_20150556_sm.pdf]

SUPPLEMENTAL MATERIAL

Klein et al., <http://www.jem.org/cgi/content/full/jem.20150556/DC1>

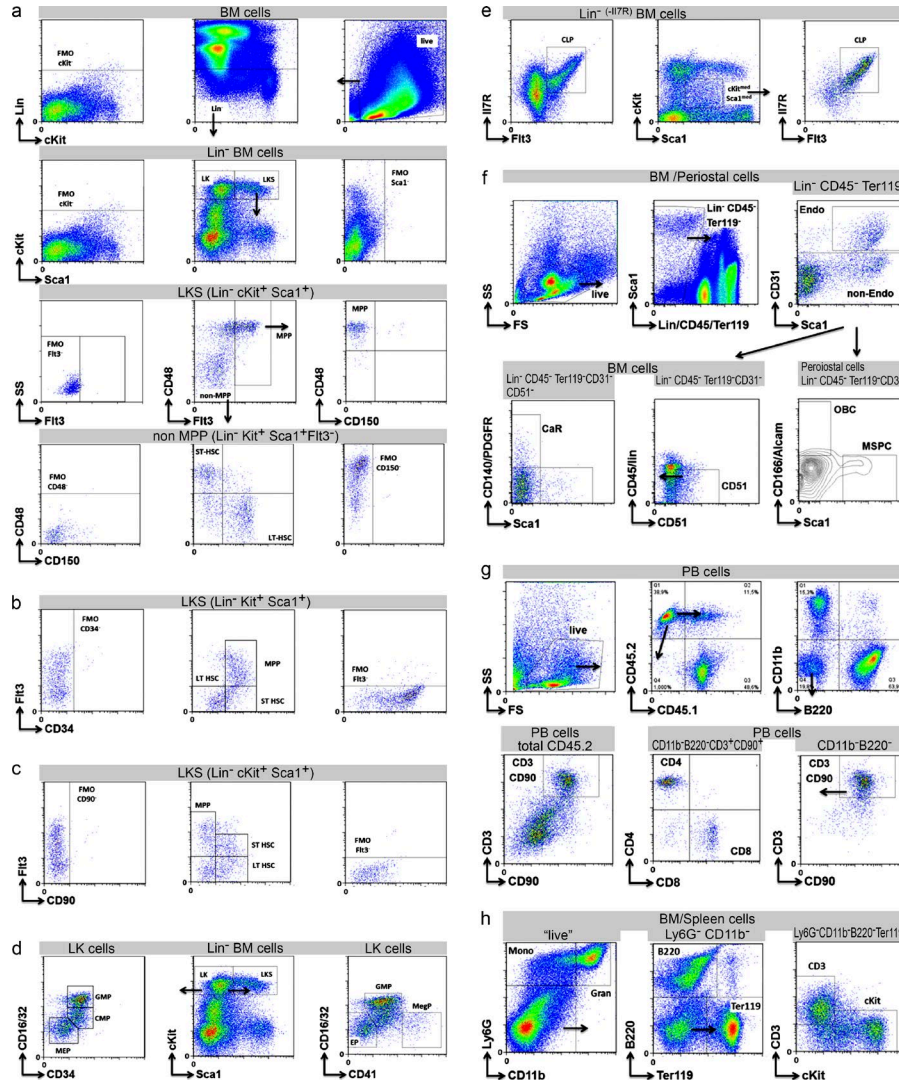

**Figure S1. Gating strategies for PB, spleen/BM cells analysis, and niche cell purification.** (a) Living BM cells (live) were separated from debris and all differentiated BM cells were depleted in order to get undifferentiated (Lin<sup>-</sup>) BM cells (first row). The threshold could be defined using the fluorescence minus one (FMO) cKit<sup>-</sup> staining. Lin<sup>-</sup> BM cells were further subdivided in Lin<sup>-</sup>cKit<sup>+</sup> (LK) cells and Lin<sup>-</sup>cKit<sup>+</sup>Sca1<sup>+</sup> (LKS) cells using the FMOs of cKit<sup>-</sup> and Sca1<sup>-</sup> (second row). LKS cells were subdivided in Flt3<sup>+</sup> multipotent progenitors (MPPs) and Flt3<sup>-</sup> short- and long-term HSCs (ST-HSCs, LT-HSCs, and non-MPP). To determine Flt3<sup>+</sup> MPPs, FMO Flt3<sup>-</sup> was used. Non-MPPs were further subdivided into CD150<sup>-</sup>CD48<sup>+</sup> ST-HSCs and CD150<sup>+</sup>CD48<sup>-</sup> LT-HSCs (fourth row). (b) LKS cells can also be partitioned into CD34<sup>-</sup>Flt3<sup>-</sup> LT-HSCs, CD34<sup>+</sup>Flt3<sup>-</sup> ST-HSCs, and CD34<sup>+</sup>Flt3<sup>+</sup> MPPs. Gates adjusted by FMO performance. (c) LKS cells can also be partitioned into CD90<sup>+</sup>Flt3<sup>+</sup> LT-HSCs, CD90<sup>+</sup>Flt3<sup>med</sup> ST-HSCs and CD90<sup>-</sup>Flt3<sup>+</sup> MPPs. Gates adjusted by FMO performance. (d) LK cells (center) were split into CD34<sup>+</sup>CD16/32<sup>high</sup> granulocyte-macrophage progenitor (GMP), CD34<sup>+</sup>CD16/32<sup>med</sup> common myeloid progenitor (CMP), and CD34<sup>-</sup>CD16/32<sup>-</sup> megakaryocyte-erythroid progenitor (MEP) cells (left). LK cells (center) could also be subdivided into CD41<sup>+</sup>CD16/32<sup>-</sup> megakaryocyte progenitor (MegP), CD41<sup>med</sup>CD16/32<sup>+</sup> granulocyte-macrophage progenitor (GMP) and CD41<sup>-</sup>CD16/32<sup>-</sup> erythroid progenitor (EP) cells (right). (e) Within the Lin<sup>-</sup>(-Il7R)cKit<sup>med</sup>Sca1<sup>med</sup> cells (center), Flt3<sup>+</sup>Il7R<sup>+</sup> CLPs can be detected (right). If all Lin<sup>-</sup>(-Il7R) cells were used for analysis (left), the fraction of CLPs is degraded. (f) Gating strategy for niche cell isolation. Lin<sup>-</sup>CD45<sup>-</sup>Ter119<sup>-</sup> cells were gated and separated into endothelial Cells (Endo, Lin<sup>-</sup>CD45<sup>-</sup>Ter119<sup>-</sup>CD31<sup>+</sup>Sca1<sup>+</sup>), expressing CD31/Sca1 and nonendothelial cells (non-Endo, Lin<sup>-</sup>CD45<sup>-</sup>Ter119<sup>-</sup>CD31<sup>-</sup>). Non-Endo bone-derived cells could be further subdivided into osteoblastic cells (OBCs; Lin<sup>-</sup>CD45<sup>-</sup>Ter119<sup>-</sup>CD31<sup>-</sup>Sca1<sup>-</sup>CD166<sup>+</sup>) and MSPCs (MSPC Lin<sup>-</sup>CD45<sup>-</sup>Ter119<sup>-</sup>CD31<sup>-</sup>Sca1<sup>+</sup>CD166<sup>-</sup>). Within Non-Endo BM-derived CD51<sup>+</sup> cells, Cxcl12-abundant reticular cells (CaR, Lin<sup>-</sup>CD45<sup>-</sup>Ter119<sup>-</sup>CD31<sup>-</sup>CD51<sup>+</sup>Sca1<sup>-</sup>CD140<sup>+</sup>) were purified. (g) Gating strategy for PB cell analysis. In transplantation settings using CD45.1 and CD45.2 chimeric mice, CD45 discrimination was used to distinguish between host (CD45.1<sup>+</sup> or CD45.2<sup>-</sup>), donor (CD45.1<sup>+</sup> or CD45.2<sup>+</sup>), or recipient (CD45.1<sup>+</sup>CD45.2<sup>+</sup>). PB cells were split up into CD11b<sup>+</sup> myeloid cells, B220<sup>+</sup> B cells, and CD11b<sup>-</sup>B220<sup>-</sup> cells which were CD3<sup>+</sup>CD90<sup>+</sup> T cells. These cells were subdivided into CD4<sup>+</sup> T helper and CD8<sup>+</sup> T cytotoxic cells. (h) Gating strategy for BM and spleen cells. Cells were split up into Ly6G<sup>+</sup>CD11b<sup>+</sup> granulocytes (Gran) and Ly6G<sup>-</sup>CD11b<sup>+</sup> monocytes (Mono). Ly6G<sup>-</sup>CD11b<sup>+</sup> cells could be subdivided into Ter119<sup>+</sup> erythroid cells or B220<sup>+</sup> B cells. Ly6G<sup>-</sup>CD11b<sup>-</sup>Ter119<sup>-</sup>B220<sup>-</sup> were CD3<sup>+</sup> T cells or cKit<sup>+</sup> progenitor/stem cells. CD3<sup>+</sup> T cells could be further discriminated as already shown in g.

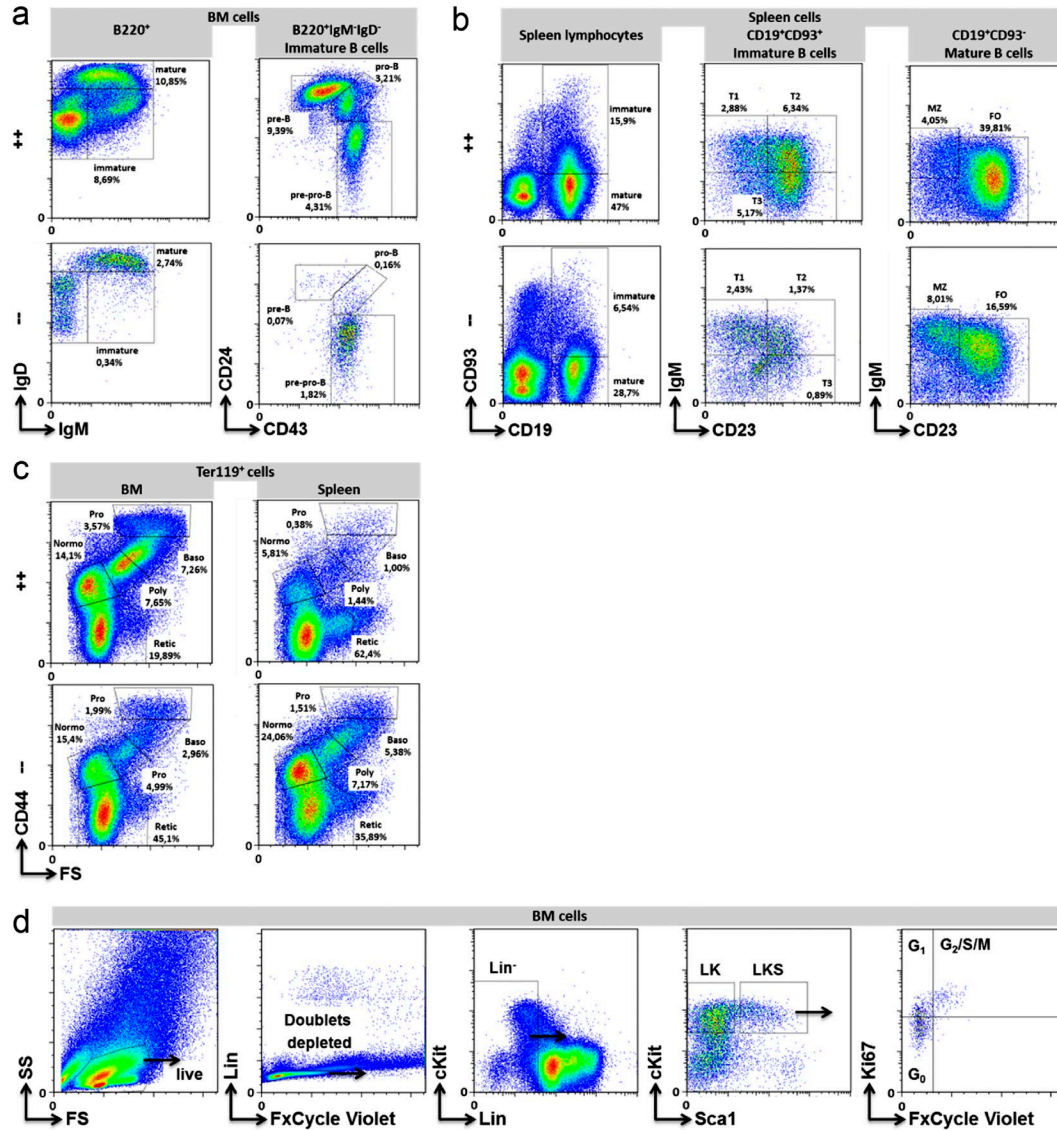

Figure S2. **Flow cytometry analyses.** (a) Flow cytometry analysis for B cell lymphopoiesis within the BM of WT and *Ptch2*<sup>-/-</sup> mice after 12 mo. B220<sup>+</sup> BM cells were subdivided into mature (B220<sup>+</sup>IgM<sup>+/+</sup>IgD<sup>+</sup>), immature (B220<sup>+</sup>IgM<sup>+/+</sup>IgD<sup>-</sup>), prepro-B cells (B220<sup>+</sup>IgM<sup>-</sup>IgD<sup>-</sup>CD43<sup>+</sup>CD24<sup>-</sup>), pro-B cells (B220<sup>+</sup>IgM<sup>-</sup>IgD<sup>-</sup>CD43<sup>+</sup>CD24<sup>+</sup>), and pre-B cells (B220<sup>+</sup>IgM<sup>-</sup>IgD<sup>-</sup>CD43<sup>-</sup>CD24<sup>+</sup>). One representative example is shown for each genotype. (b) Flow cytometry analysis for B cell maturation within the spleen of WT and *Ptch2*<sup>-/-</sup> mice after 12 mo. Spleen cells were subdivided into mature (CD19<sup>+</sup>CD93<sup>-</sup>) and immature (CD19<sup>+</sup>CD93<sup>+</sup>) populations. Mature B cells were subdivided into marginal zone (MZ) B cells (CD19<sup>+</sup>CD93<sup>-</sup>CD23<sup>-</sup>IgM<sup>+</sup>) and follicular (FO) B cells (CD19<sup>+</sup>CD93<sup>-</sup>CD23<sup>+</sup>IgM<sup>-/+</sup>). Immature B cells were subdivided into transitional (T) B cells T1 (CD19<sup>+</sup>CD93<sup>+</sup>CD23<sup>-</sup>IgM<sup>+</sup>), T2 (CD19<sup>+</sup>CD93<sup>+</sup>CD23<sup>+</sup>IgM<sup>+</sup>), and T3 (CD19<sup>+</sup>CD93<sup>+</sup>CD23<sup>+</sup>IgM<sup>-</sup>) cells. One representative example is shown for each genotype. (c) Flow cytometry analysis of BM and spleen cells for erythroid progenitors of WT and *Ptch2*<sup>-/-</sup> mice after 12 months. Ter119<sup>+</sup> cells could be subdivided into all stages of erythropoiesis: FS<sup>high</sup>CD44<sup>high</sup> proerythroblasts (Pro), FS<sup>high</sup>CD44<sup>med</sup> basophilic erythroblasts (Baso), FS<sup>med</sup>CD44<sup>med</sup> polychromatic erythroblasts (Poly), FS<sup>low</sup>CD44<sup>med</sup> normoblasts, and FS<sup>low</sup>CD44<sup>low</sup> reticulocytes (Retic). One representative example is shown for each genotype. (d) Gating strategy for LKS cell cycle analysis (BM cells). HSCs are subdivided into Ki67<sup>-</sup>FxCycleViolet<sup>low</sup> cells (G<sub>0</sub>), Ki67<sup>+</sup>FxCycleViolet<sup>low</sup> cells (G<sub>1</sub>), and Ki67<sup>+</sup>FxCycleViolet<sup>high</sup> cells (G<sub>2</sub>/S/M).

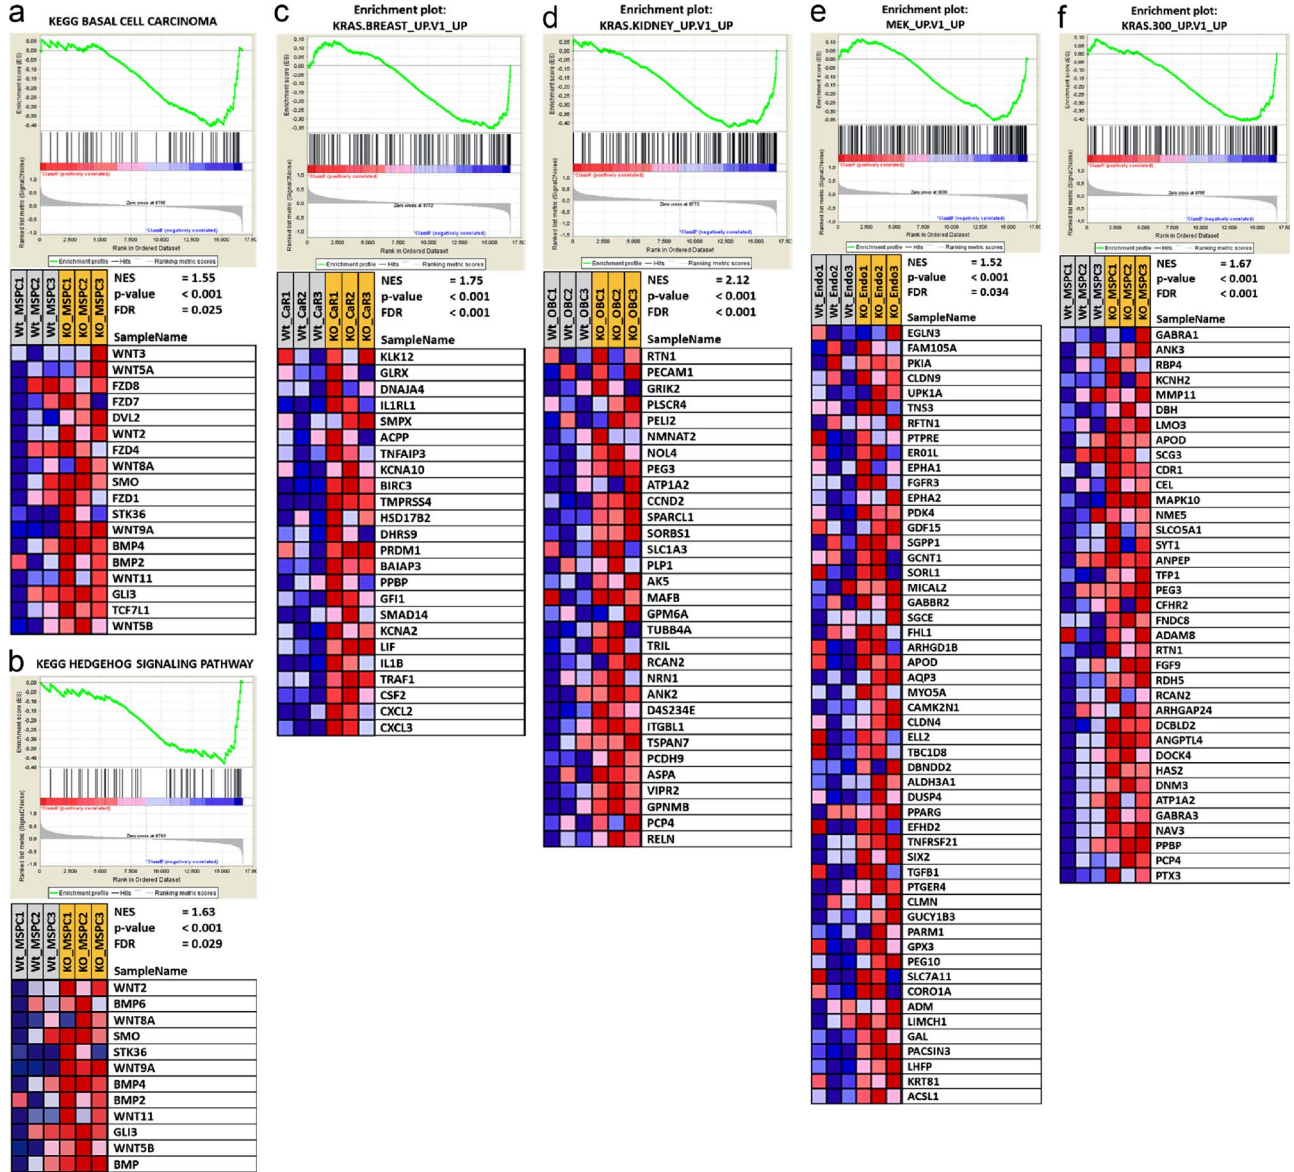

Figure S3. Enrichment plots and heat maps for core enrichment genes. (a and b) Enrichment plots and heat maps for core enrichment genes were generated by GSEA using the KEGG gene sets. NES, nominal p-value, and FDR are shown for each gene set. Comparison of WT versus Ptc2<sup>-/-</sup> MSPCs identifies up-regulation of the Basal cell carcinoma. (a) Gene set and up-regulation of the Hedgehog signaling pathway. (b) Gene set. (c–f) Enrichment plots and heat maps for core enrichment genes were generated by GSEA using the oncogenic signature gene sets. NES, nominal p-value, and FDR are shown for each gene set. Comparison of WT versus Ptc2<sup>-/-</sup> CaR (c), OBCs (d), endothelial cells (e) and MSPCs (f) reveals an increase of Map–Erk kinase signaling within all four Ptc2<sup>-/-</sup> subpopulations.

Table S1. Patient characteristics

| ID | Sex | Age | Material | Diagnosis         | Genetic aberration                 |
|----|-----|-----|----------|-------------------|------------------------------------|
| 1  | F   | -   | EDTA-PB  | Control           | n.d.                               |
| 2  | M   | -   | EDTA-PB  | Control           | n.d.                               |
| 3  | F   | -   | EDTA-PB  | Control           | n.d.                               |
| 4  | M   | -   | EDTA-PB  | Control           | n.d.                               |
| 5  | M   | -   | EDTA-PB  | Control           | n.d.                               |
| 6  | M   | -   | EDTA-PB  | Control           | n.d.                               |
| 7  | M   | -   | EDTA-PB  | Control           | n.d.                               |
| 8  | F   | -   | EDTA-PB  | Control           | n.d.                               |
| 9  | M   | -   | EDTA-PB  | Control           | n.d.                               |
| 10 | F   | 52  | EDTA-PB  | polycythemia vera | Jak2V617F                          |
| 11 | F   | 63  | EDTA-PB  | polycythemia vera | Jak2V617F                          |
| 12 | F   | 71  | EDTA-PB  | polycythemia vera | Jak2V617F                          |
| 13 | F   | 63  | EDTA-PB  | polycythemia vera | Jak2V617F                          |
| 14 | M   | 44  | EDTA-PB  | polycythemia vera | Jak2V617F                          |
| 15 | M   | 48  | EDTA-PB  | polycythemia vera | Jak2V617F                          |
| 16 | F   | 45  | EDTA-PB  | polycythemia vera | Jak2V617F                          |
| 17 | F   | 52  | EDTA-PB  | polycythemia vera | Jak2V617F                          |
| 18 | F   | 58  | EDTA-PB  | polycythemia vera | Jak2V617F                          |
| 19 | M   | 49  | EDTA-PB  | polycythemia vera | Jak2V617F                          |
| 20 | M   | 63  | EDTA-PB  | polycythemia vera | Jak2V617F                          |
| 21 | M   | 23  | EDTA-PB  | polycythemia vera | Jak2V617F                          |
| 22 | M   | 62  | EDTA-PB  | polycythemia vera | Jak2V617F                          |
| 23 | M   | 65  | EDTA-PB  | OMF               | Jak2V617F                          |
| 24 | M   | 71  | EDTA-PB  | OMF               | Jak2V617F                          |
| 25 | F   | 66  | EDTA-PB  | OMF               | Jak2V617F                          |
| 26 | M   | 53  | EDTA-PB  | OMF               | Jak2V617F                          |
| 27 | F   | 49  | EDTA-PB  | CML, BC           | BcrAbl                             |
| 28 | M   | 55  | EDTA-PB  | CML, BC           | BcrAbl                             |
| 29 | M   | 37  | EDTA-PB  | CML, BC           | BcrAbl                             |
| 30 | F   | 78  | EDTA-PB  | CML, BC           | BcrAbl                             |
| 31 | M   | 46  | EDTA-PB  | CML, CP           | BcrAbl                             |
| 32 | F   | 57  | EDTA-PB  | CML, CP           | BcrAbl                             |
| 33 | M   | 18  | EDTA-PB  | CML, CP           | BcrAbl                             |
| 34 | M   | 84  | EDTA-PB  | CML, CP           | BcrAbl                             |
| 35 | F   | 63  | EDTA-PB  | CML, CP           | BcrAbl                             |
| 36 | M   | 43  | EDTA-PB  | CML, CP           | BcrAbl                             |
| 37 | M   | 53  | EDTA-PB  | CML, CP           | BcrAbl                             |
| 38 | M   | 35  | EDTA-PB  | CML, CP           | BcrAbl                             |
| 39 | F   | 44  | EDTA-PB  | CML, CP           | BcrAbl                             |
| 40 | M   | 61  | EDTA-PB  | sec. AML          | SF3B1, RUNX1                       |
| 41 | M   | 61  | EDTA-PB  | sec. AML          | KIT D816V                          |
| 42 | F   | 78  | EDTA-PB  | sec. AML          | complex karyotype                  |
| 43 | M   | 70  | EDTA-PB  | sec. AML          | 47XY +8 [1]+                       |
| 44 | M   | 75  | EDTA-PB  | sec. AML          | complex karyotype                  |
| 45 | M   | 53  | EDTA-PB  | sec. AML          | complex karyotype                  |
| 46 | F   | 50  | EDTA-PB  | sec. AML          | IDH2                               |
| 47 | M   | 55  | EDTA-PB  | sec. AML          | del12q                             |
| 48 | M   | 74  | EDTA-PB  | sec. AML          | FLT3 <sup>+</sup>                  |
| 49 | M   | 73  | EDTA-PB  | AML               | FLT3 <sup>-</sup> , NPM1           |
| 50 | M   | 74  | EDTA-PB  | AML               | FLT3 <sup>-</sup>                  |
| 51 | M   | 54  | EDTA-PB  | AML               | FLT3 <sup>-</sup>                  |
| 52 | M   | 33  | EDTA-PB  | AML               | FLT3 <sup>-</sup>                  |
| 53 | F   | 51  | EDTA-PB  | AML               | FLT3 <sup>-</sup> , NPM1           |
| 54 | M   | 36  | EDTA-PB  | AML               | FLT3 <sup>+</sup> , del16q22(CBFβ) |
| 55 | F   | 55  | EDTA-PB  | AML               | FLT3 <sup>-</sup> , NPM1           |
| 56 | F   | 64  | EDTA-PB  | AML               | FLT3 <sup>-</sup> , NPM1           |
| 57 | F   | 55  | EDTA-PB  | AML               | FLT3 <sup>-</sup> , NPM1           |
| 58 | M   | 73  | EDTA-PB  | AML               | FLT3 <sup>+</sup>                  |
| 59 | M   | 49  | EDTA-PB  | AML               | FLT3 <sup>+</sup>                  |
| 60 | M   | 67  | EDTA-PB  | AML               | n.d.                               |
| 61 | M   | 63  | EDTA-PB  | AML               | FLT3 <sup>+</sup>                  |
| 62 | M   | 48  | EDTA-PB  | AML               | FLT3 <sup>+</sup>                  |

Table S1. Patient characteristics (Continued)

| ID | Sex | Age | Material | Diagnosis | Genetic aberration   |
|----|-----|-----|----------|-----------|----------------------|
| 63 | F   | 78  | EDTA-PB  | AML       | FLT3 <sup>+</sup>    |
| 64 | F   | 47  | EDTA-PB  | AML       | 45,XX,-7             |
| 65 | M   | 65  | EDTA-PB  | AML       | FLT3 <sup>+</sup>    |
| 66 | F   | 60  | EDTA-PB  | AML       | karyotype 47 XX      |
| 67 | F   | 74  | EDTA-PB  | AML       | 48-49,XX, + r(8)x2-3 |
| 68 | F   | 76  | EDTA-PB  | AML       | FLT3 <sup>+</sup>    |

Characteristics from healthy controls and patients (M, male; F, female), whose PB was used for mRNA extraction and purification and RT-PCR analysis. n.d., not detected; OMF, osteomyelofibrosis; BC, blast crisis; CP, chronic phase.

Table S2. Molecular Signature Database oncogenic signatures

| Gene sets/pathways            | CaR NES | OBC NES | MSPC NES | Endo NES |
|-------------------------------|---------|---------|----------|----------|
| KRAS.300 UP.V1 UP             |         | -1,600  | -1,670   | -1,530   |
| KRAS.50 UP.V1 UP              | -1,200  | -1,240  | -1,500   | -1,560   |
| KRAS.600 UP.V1 DN             |         | -1,520  |          |          |
| KRAS.600 UP.V1 UP             |         | -1,650  | -1,380   | -1,260   |
| KRAS.600.LUNG.BREAST UP.V1 DN |         | -1,510  |          |          |
| KRAS.600.LUNG.BREAST UP.V1 UP | -1,280  | -1,540  | -1,440   |          |
| KRAS.AMP.LUNG UP.V1 DN        |         |         | -1,340   |          |
| KRAS.AMP.LUNG UP.V1 UP        | -1,390  | -1,310  | -1,340   | -1,580   |
| KRAS.BREAST UP.V1 UP          | -1,750  | -1,590  |          |          |
| KRAS.BREAST UP.V1 UP          |         | -1,650  |          |          |
| KRAS.KIDNEY UP.V1 DN          |         | -1,450  |          |          |
| KRAS.KIDNEY UP.V1 UP          |         | -2,120  | -1,950   |          |
| KRAS.LUNG UP.V1 UP            |         |         |          | -1,420   |
| KRAS.LUNG.BREAST UP.V1 DN     |         | -1,840  | -1,240   |          |
| KRAS.LUNG.BREAST UP.V1 UP     | -1,730  | -2,020  | -1,310   |          |
| KRAS.PROSTATE UP.V1 DN        |         |         | -1,310   |          |
| MEK UP.V1 UP                  |         | -1,220  |          | -1,520   |

Molecular Signature Database subcollection "oncogenic signatures" was used to identify dysregulated Map-Erk pathway members. WT or Ptch2<sup>-/-</sup> niche cell subpopulations were analyzed and compared to each other. Negative results represent up-regulation in Ptch2<sup>-/-</sup> cells. Settings: NES < -1.20 (meaning 20% up-regulated in Ptch2<sup>-/-</sup>), nominal p-value < 0.001, and FDR < 0.25.

Table S3. **Genes and primers**

| Gene locus           | Species | Primer       | Vendor            |
|----------------------|---------|--------------|-------------------|
| TaqMan Primer, human |         |              |                   |
| <i>BCL2</i>          | Hs      | 00608023_m1  | Life Technologies |
| <i>CCND1</i>         | Hs      | 00765553_m1  | Life Technologies |
| <i>DHH</i>           | Hs      | 00928824_m1  | Life Technologies |
| <i>GAPDH</i>         | Hs      | 02758991_g1  | Life Technologies |
| <i>GLI1</i>          | Hs      | 00171790_m1  | Life Technologies |
| <i>PTCH1</i>         | Hs      | 00970980_m1  | Life Technologies |
| <i>PTCH2</i>         | Hs      | 01085643_m1  | Life Technologies |
| <i>SHH</i>           | Hs      | 00179843_m1  | Life Technologies |
| <i>SMO</i>           | Hs      | 01090242_m1  | Life Technologies |
| TaqMan Primer, mouse |         |              |                   |
| <i>Angpt1</i>        | Mm      | 00456503_m1  | Life Technologies |
| <i>Bcl2</i>          | Mm      | 00477631_m1  | Life Technologies |
| <i>Ccnd2</i>         | Mm      | 00438071_m1  | Life Technologies |
| <i>Cxcl12</i>        | Mm      | 00445553_m1  | Life Technologies |
| <i>Dhh</i>           | Mm      | 030535542_s1 | Life Technologies |
| <i>Gapdh</i>         | Mm      | 4352339E     | Life Technologies |
| <i>Gli1</i>          | Mm      | 00494645_m1  | Life Technologies |
| <i>Ihh</i>           | Mm      | 00439613_m1  | Life Technologies |
| <i>Jag1</i>          | Mm      | 00496902_m1  | Life Technologies |
| <i>KitL</i>          | Mm      | 00442972_m1  | Life Technologies |
| <i>Ptch1</i>         | Mm      | 01306904_m1  | Life Technologies |
| <i>Ptch2</i>         | Mm      | 00436047_m1  | Life Technologies |
| <i>Shh</i>           | Mm      | 00436527_m1  | Life Technologies |
| <i>Smo</i>           | Mm      | 01162710_m1  | Life Technologies |
| <i>Spp1</i>          | Mm      | 00436767_m1  | Life Technologies |
| <i>Thpo</i>          | Mm      | 00437040_m1  | Life Technologies |
| <i>Tnfsf11</i>       | Mm      | 00441906_m1  | Life Technologies |
